# 1 **Marine metabolomics: Measurement of metabolites in** 2 **seawater by gas-chromatography mass spectrometry**

3  
4 E. Maggie Sogin<sup>1\*</sup>, Erik Puskas<sup>1</sup>, Nicole Dubilier<sup>1</sup>, Manuel Liebeke<sup>1\*</sup>

5 1-Max Planck Institute for Marine Microbiology, Celsiusstrasse 1, Bremen, Germany

6 \*Corresponding authors

7 Maggie Sogin, email: [esogin@mpi-bremen.de](mailto:esogin@mpi-bremen.de), tel: +49 421 2028-823

8 Manuel Liebeke email: [mliebeke@mpi-bremen.de](mailto:mliebeke@mpi-bremen.de), tel: +49 421 2028-822

## 9 **Abstract**

10 All life exchanges molecules with its environment. While these metabolites are commonly  
11 measured in terrestrial and limnic ecosystems, the presence of salt in marine habitats has  
12 hampered quantitative analyses of the ocean metabolome. To overcome these limitations, we  
13 developed SeaMet, a gas chromatography-mass spectrometry (GC-MS) method that detects  
14 hundreds of metabolites down to nano-molar concentrations in less than one milliliter of  
15 seawater. Using a set of metabolites dissolved in artificial seawater to benchmark our method,  
16 we show metabolite signal detection increased on average across ions by 324 fold in comparison  
17 to standard GC-MS methods. Our observed signal improvement occurred across tested  
18 metabolite classes and provides reproducible and quantifiable results. To showcase the  
19 capabilities of our method, we used SeaMet to explore the production and consumption of  
20 metabolites during culture of a heterotrophic bacteria that is widespread in the North Sea. Our

1 approach revealed successional uptake of amino acids, while sugars were not consumed, and  
2 highlight the power of metabolomics in providing insights into nutrient uptake and energy  
3 conservation in marine microorganisms. We also applied SeaMet to explore the in situ  
4 metabolome of coral reef and mangrove sediment porewaters. Despite the fact that these  
5 ecosystems occur in nutrient-poor waters, we uncovered a remarkable diversity and abundance  
6 of sugars and fatty acids, compounds predicted to be rapidly consumed by marine  
7 microorganisms. Our method advances marine metabolomics by enabling the unbiased, and  
8 quantitative analysis of marine metabolites, and will help provide new insights into carbon cycle  
9 dynamics and ocean biogeochemistry.

10  
11  
12  
13  
14  
15  
16  
17  
18  
19  
20  
21  
22  
23  
24  
25

1 Gas chromatography-mass spectrometry (GC-MS) analysis enables the detection of primary  
2 metabolites, small molecules that occur in central metabolic pathways across biological systems (1,2).  
3 High reproducibility coupled to the widespread availability of annotation resources make GC-MS the  
4 “workhorse” of analytical chemistry facilities. GC-MS has allowed the identification of metabolites  
5 associated with human disease (3), detection of compounds that serve as environmental cues in foraging  
6 (4), and description of metabolic fluxes within and between cells (5). GC-MS is also widely used for  
7 environmental profiling of soils and microbial activity on land (6,7).

8 In contrast to terrestrial or limnic systems, the defining characteristic of marine habitats - high salt  
9 concentration - inhibits MS-based metabolomic analysis. Consequently, our knowledge of metabolite  
10 composition of the oceans is severely limited. This, in turn, restricts our understanding of global  
11 biogeochemical cycles, as the oceans contain the largest organic carbon pool on Earth (8). While  
12 metagenomic and metatranscriptomic studies of the ocean, driven by low sequencing costs and projects  
13 like Tara Oceans (9), have deepened our knowledge of the identity and activity of marine microbes,  
14 current metabolomic techniques do not permit equivalent surveys of the ocean metabolome.

15 The ocean metabolome remains largely undefined, despite a growing field of research exploring  
16 the molecular composition of dissolved organic matter (8, 10-12). Current efforts rely on solid phase  
17 extraction (SPE) methods to remove salt prior to MS analyses (10,11). SPE’s successful removal of salt  
18 from marine samples is accompanied by co-removal of small polar compounds, which are the primary  
19 components of the liable organic matter pool (13). Consequently, while SPE-based studies can measure  
20 up to 50% of the organic carbon from the ocean, they fail to detect the majority of compounds involved in  
21 the central metabolism of cells. Furthermore, current DOM analytical approaches remain largely  
22 inaccessible for the majority of research institutions and projects. This is largely due to high  
23 instrumentation costs, large sample volume requirements, and the long amount of time needed for  
24 metabolome analysis. To more efficiently decipher ocean metabolism, it is necessary to develop cost-  
25 effective, high-throughput, and untargeted workflows that can readily identify and quantify molecules

1 from high salinity environments. Here, we present SeaMet, a marine metabolomics method that uses  
2 sample derivatization to enable metabolite detection in seawater using GC-MS.

3

## 4 **Results and Discussion**

5 SeaMet modifies the well-established two-step metabolite derivatization procedure, which  
6 permits the detection of non-volatile compounds using GC-MS, and involves methoximation followed by  
7 trimethylsilylation (14). Like other GC-MS sample preparation techniques (15,16), SeaMet removes  
8 liquid through vacuum drying prior to derivatization - a process that results in a salt pellet when working  
9 with marine samples, which restricts MS analysis. Our initial results suggested that water locked within  
10 the dried salt crystals hindered the chemical reactions needed for GC-MS (Figure S1A, B). Our method  
11 overcomes this limitation by first eliminating residual water within the salt crystals and then extracting  
12 small compounds into the derivatization reagents (Figure 1A).

13

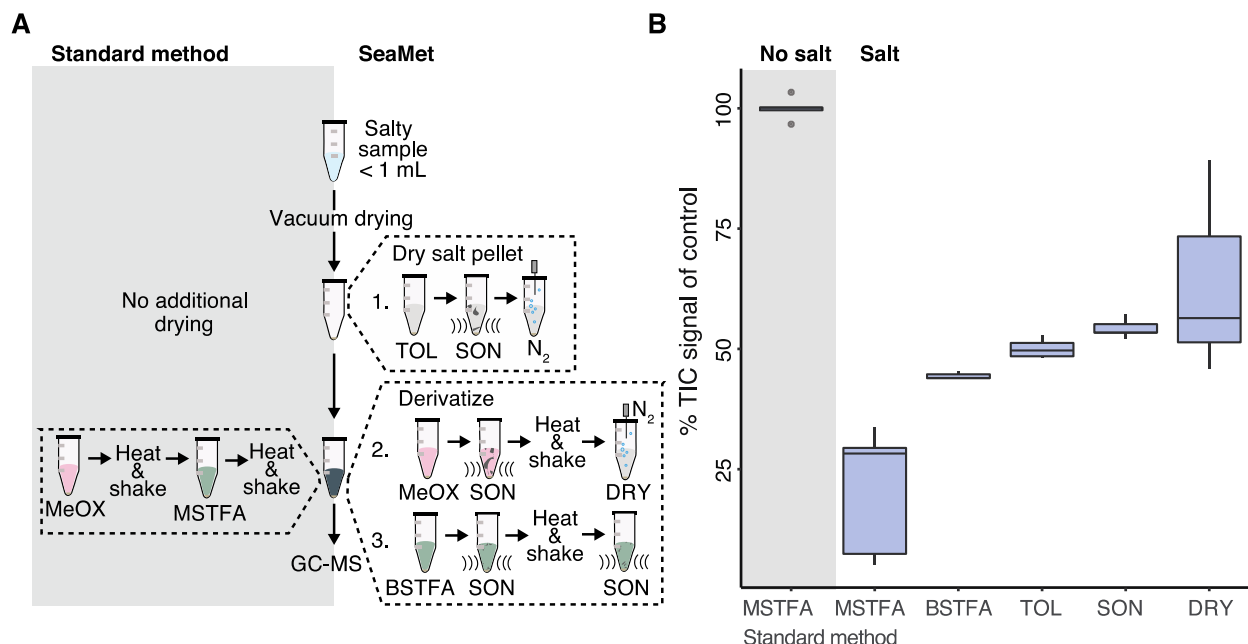

14 **Figure 1. How SeaMet works.** A, Modifications to the standard two-step methoximation (MeOX)-  
15 trimethylsilylation (TMS) derivatization protocol include key steps that enhance metabolite detection in seawater as  
16 shown in b. Steps modified from the standard method include a switch in derivatization reagents from MSTFA to  
17 BSTFA, further drying of the salt pellet using toluene (TOL) to remove water azeotropically, ultrasonication (SON)  
18 after the addition of TOL, MeOX, BSTFA, and after the BSTFA reaction, and drying (DRY) of the pyridine after  
19

1 the MeOX reaction prior to BSTFA addition. **B**, Boxplots showing the total detected signals from each  
2 chromatogram after GC-MS from a synthetic mixture of 45 metabolites (**Table S1**) dissolved in 0.5 mL of seawater  
3 ( $n = 5$ ) relative to the no salt control average.  
4  
5

## 6 **A promising GC-MS method to advance marine metabolomics research**

7 We used a synthetic mixture of 45 metabolites (**Table S1**) dissolved in artificial seawater to  
8 document the performance in metabolite detection of our method. Overall, SeaMet increased total signal  
9 intensity on average by 42% and up to 89% for high salinity samples in comparison to the standard GC-  
10 MS sample preparation (**Figure 1B**). We first replaced the most commonly used trimethylsilylation  
11 reagent, N-methyl-N-(trimethylsilyl)trifluoroacetamide (MSTFA)(**16**), with one that is less susceptible to  
12 inhibition by water, N, O-Bistrifluoroacetamide (BSTFA), which resulted in higher metabolite signals  
13 (**Figure S1B**). To eliminate water from the samples, we increased the speed-vacuum drying time from  
14 four to eight hours, and integrated a toluene drying step that is used in urine-based metabolomic analyses  
15 (**15**). We further enhanced metabolite signals by treating the salt pellet to a combination of ultrasonication  
16 and vortexing after the addition of toluene and both derivatization reagents, and following completion of  
17 the trimethylsilylation reaction. These steps break apart the salt crystals and release water into the toluene  
18 to enhance salt drying and metabolite extraction. Finally, following a recently described method for  
19 improving metabolite detection regardless of sample type (**17**), we dried the samples between the  
20 methoximation and trimethylsilylation derivatization reactions under N<sub>2</sub> gas (see **Figure 1B** for signal  
21 improvements of each step).

22 Overall, SeaMet allowed us to detect significant increases in metabolite abundances across  
23 molecular classes when compared to the standard method (adjusted  $p$ -value < 0.05; mean fold change  
24 across all ions = 323; **Figure 2A**). This included measurement of organic acids, amino acids, and fatty  
25 acids, as well as sugars (and their stereoisomers), sugar alcohols, and sterols (**Table S1**). Our detection  
26 limits in the nano-molar range are comparable to those of targeted techniques for marine ecosystems that  
27 were developed to quantify single compounds from specific molecular classes (**Tables S2 and S3**).  
28 Moreover, our workflow only requires 0.5 mL to 1 mL of seawater for metabolite detection, at least an

1 order of magnitude less sample volumes than previously published techniques (**13,18**). To date, we have  
2 successfully measured 107 metabolite standards dissolved in artificial seawater, representing major  
3 metabolite groups involved in primary metabolic pathways (**Table S4**), highlighting that SeaMet can be  
4 used for both targeted and untargeted applications. Our method provides reproducible quantification and  
5 gives similar linearity, dynamic range, and coefficient of variation values as salt-free samples prepared  
6 with the standard GC-MS derivatization procedure (**Table S2; Figure S2A-H**).

7

### 8 **SeaMet can monitor cell culture physiology**

9 To demonstrate that our method captures compounds commonly missed by SPE-based  
10 metabolomic approaches, we compared GC-MS profiles using SeaMet before and after SPE sample  
11 treatment. Our method detected small polar compounds that are co-removed with salt during SPE  
12 preparation, such as sugars, sugar alcohols, amino acids, and organic acids (**Figure 2B**). Given our  
13 results, SeaMet is complementary to current marine DOM characterization approaches that require SPE  
14 preparation and high-resolution MS for metabolite detection. Thus, SeaMet expands the possibilities for  
15 metabolite analysis in the ocean and advances marine metabolomics by recovering compounds that  
16 previously could not be analyzed by current platforms in a single analysis.

17

18

19

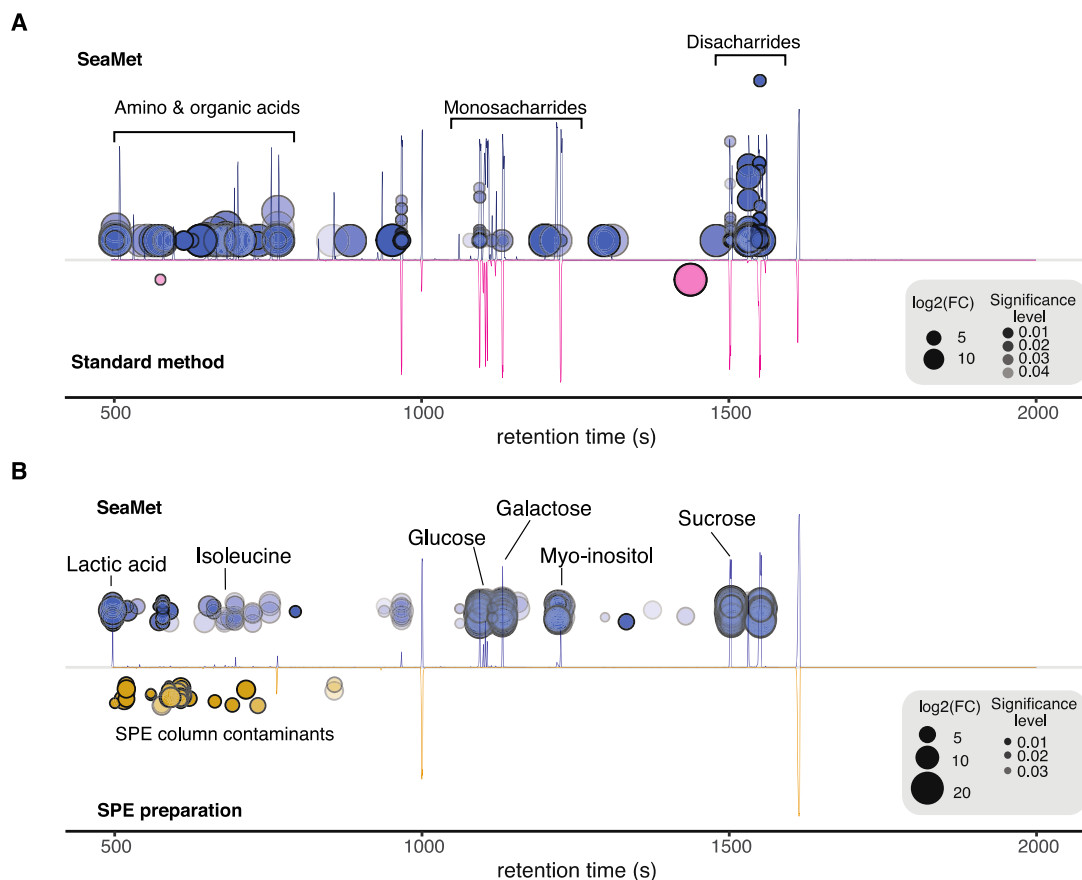

1  
2 **Figure 2. SeaMet enhances the detection of metabolites in marine samples. A, B** Total ion chromatogram cloud  
3 plots from metabolite mixture samples indicate significant differences (B.H.  $p < 0.05$ ) between ion abundances  
4 when comparing **A**, SeaMet (top) to the standard (bottom) protocol and **B**, chromatograms using SeaMet before  
5 (top) and after (bottom) solid phase extraction (SPE). Larger bubbles indicate higher  $\log_2(\text{fold changes})$  between  
6 groups and more intense colors represent lower t-test p-values when comparing individual feature ( $m/z$  ions)  
7 intensities. Samples prepared with SeaMet had high abundances of organic acids (lactic acid, succinic acid, and  
8 fumarate), amino acids (isoleucine, leucine, threonine and valine), sugar alcohols (myo-inositol and mannitol), and  
9 sugars (fructose, glucose, cellobiose, maltose, ribose, galactose, and sucrose) in comparison to SPE-based sample  
10 preparation. Representatives of each class are indicated in **B**.  
11

12 To demonstrate the power of our approach in characterizing metabolite profiles of marine  
13 bacteria, we monitored changes in the exo-cellular metabolome during growth of a heterotrophic  
14 Proteobacterium, *Marinobacter adhaerens*. Using SeaMet, we observed significant changes in the  
15 metabolite composition of marine culture medium during the bacteria's initial growth phase (adjusted  $p$ -  
16 value  $< 0.05$ ; **Figure 3A; Figure S3A, B**). The bacteria took up different carbon and nitrogen resources in  
17 a cascade-like fashion, and later in growth, began excretion of an undescribed compound (**Figure 3A, B;**  
18 **Figure S4**). Successional dynamics in substrate use is a common energy conservation mechanism in

1 bacteria (19) and affects central carbon and nitrogen dynamics during growth. With SeaMet, we show that  
 2 like many bacteria, *M. adhaerens* participates in the release of organic carbon, which can be metabolized  
 3 by other microorganisms or will contribute to the complexity of refractory DOM. By identifying and  
 4 quantifying metabolites that are consumed and excreted in cultivable marine bacteria, our method  
 5 expands our understanding of key primary compounds involved in the transformation of organic matter in  
 6 the ocean.

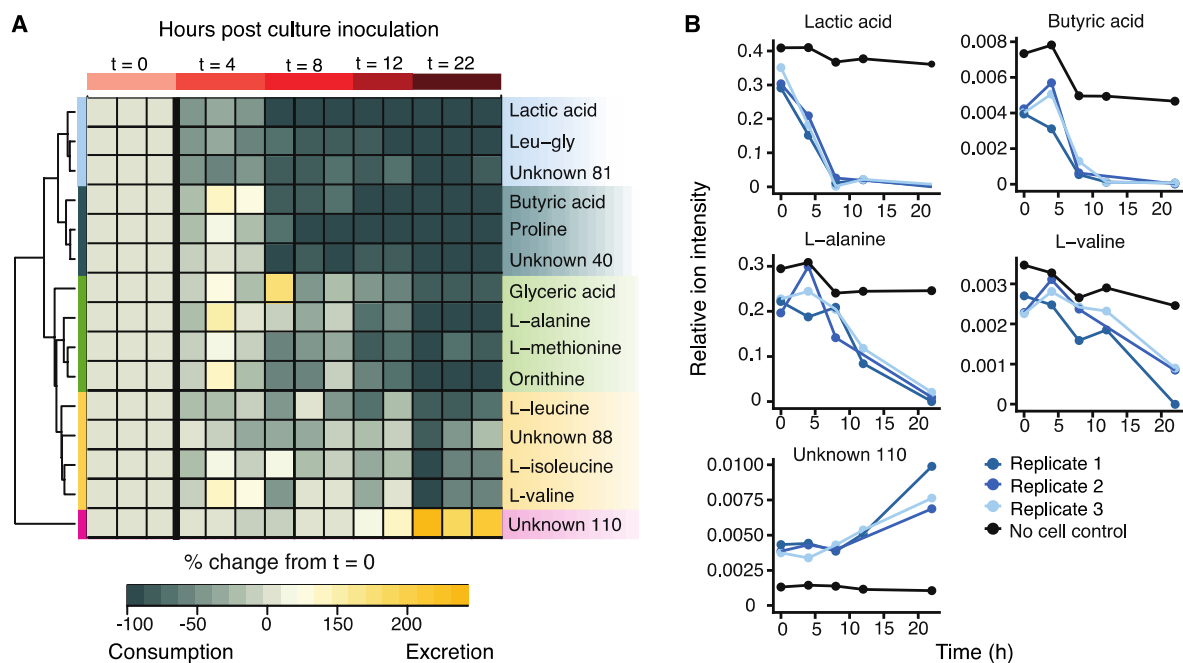

7  
 8  
 9 **Figure 3. Metabolite consumption and excretion during culture of a marine bacterium.** **A**, A heatmap of  
 10 metabolite abundances relative to starting conditions during the culture of the heterotroph *Marinobacter adhaerens*  
 11 in marine broth indicates some compounds, like the dipeptide leucine-glycine (leu-gly), and lactic acid are taken up  
 12 before others, such as branch chain amino acids. After 12–22 hours of growth, the bacterial culture excretes an  
 13 unknown compound (Unknown 110). Hierarchical clustering shows groups of metabolites that changed significantly  
 14 during the experiment (left hand colored bars, B.H. adjusted p-value < 0.05; fold change > 2). These metabolite  
 15 groups represent successive stages in *M. adhaerens* consumption and production of marine broth components. **B**,  
 16 Relative ion abundances over time for select metabolites from each cluster group depicted in **A**. The blue lines  
 17 represent biological replicate cultures while the black line shows results from a control sample with no cell addition.  
 18 Low variation among biological replicates highlights the reproducibility of our marine metabolomics method.

19  
 20  
 21  
 22



## 1 SeaMet is a powerful tool for exploring ocean chemistry

2 To test the ability of our workflow to assess complex environmental metabolomes, we applied  
3 SeaMet to samples from coralline and mangrove sediment porewaters. Coral reefs and mangroves, two  
4 globally important coastal ecosystems, contain many biological compounds that remain undescribed. It is  
5 essential to characterize the metabolome of these habitats to understand the role of these ecosystems in  
6 biogeochemical cycling. Our approach detected 295 and 428 metabolite peaks from coralline and  
7 mangrove sediment profiles (**Figure 4 A, B**), including sugars and amino acids, organic acids, fatty acids,  
8 and background signals. Diverse and abundant sugars from coralline sediments as well as fatty acids from  
9 mangroves drove the observed significant differences between habitats (ADONIS  $p$ -value < 0.001,  $R^2 =$   
10 0.514; **Figure S5 A, B and Table S5**). Considering corals and mangroves thrive in oligotrophic waters  
11 and their associated sediments harbor diverse and abundant microorganisms, we were surprised to  
12 measure high abundances of energy-rich metabolites that are typically consumed in primary metabolism.  
13 These data call for a reexamination of carbon sequestration in coastal sediments using techniques that can  
14 identify and quantify the accumulation of liable metabolites.

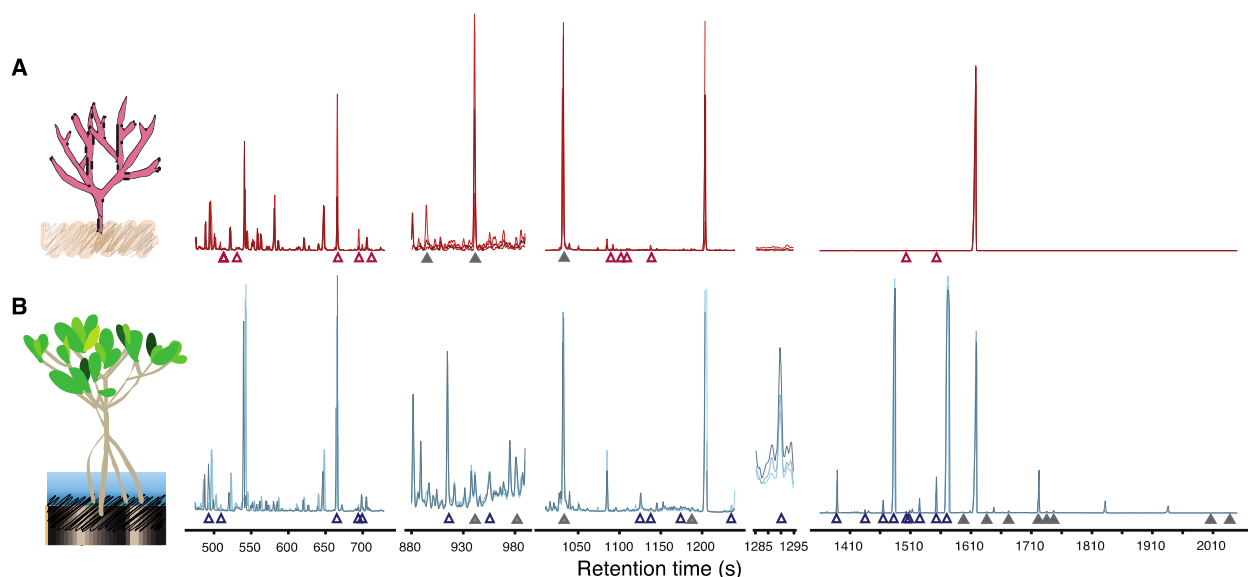

15  
16 **Figure 4. Metabolite profiles from marine habitats.** SeaMet GC-MS metabolomic profiles from **A**,  
17 coralline and **B**, mangrove sediment porewaters show high concentrations of identified (open triangles) fatty acids  
18 and sugars that are driving multivariate differences in composition (*SI Appendix Fig. S5A*). Profiles also reveal  
19 unknown peaks (filled triangles) for which no matches were found in public databases (**Table S5**).  
20

1           Due to the technical difficulties of detecting metabolites in seawater, a large portion of ocean  
2 chemistry remains unannotated, reflecting one of the central challenges in metabolomics research (20).  
3 By providing a new method to measure a broad scope of the marine metabolome, we offer an avenue to  
4 identify molecules from marine environments and expand existing mass spectrometry databases that aim  
5 to characterize chemical space across ecosystems. As an example, our samples from sediment porewaters  
6 of mangroves and coral reefs revealed 11 metabolites driving variation between habitats that did not  
7 match public database entries (Table S5)(21,22).

8

## 9 **Conclusions**

10           We have presented SeaMet, a marine metabolomics workflow that enables the analysis of  
11 primary metabolism in the oceans. It is time efficient, allows the detection of diverse metabolite classes in  
12 a single run, and expands the analytical window for molecules that can be detected within marine  
13 samples. This advance enables untargeted metabolomics for marine ecosystems using a low-cost, easy to  
14 use GC-MS platform. Moreover, SeaMet is independent of MS instrumentation, allowing it to be  
15 combined with time-of-flight or Orbitrap MS detectors to provide faster analysis time and higher mass  
16 resolving power to improve metabolite identification. We expect our marine metabolomics workflow will  
17 enable the exploratory analysis of metabolites occurring in seawater and thereby advance our  
18 understanding of the ocean's vast and largely unexplored metabolome.

19

20

21

22

23

1  
2  
3  
4  
5  
6  
7  
8  
9  
10  
11  
12  
13  
14  
15  
16  
17  
18  
19  
20  
21  
22  
23  
24  
25  
26  
27

### Materials and Methods

**Data availability.** All metabolite profile data will be made publicly available at Metabolights (<https://www.ebi.ac.uk/metabolights/>) under identification numbers MTBLS826, MTBLS839, MTBLS843, MTBLS844, MTBLS848, and MTBLS849 (currently IN REVIEW) or by contact with the authors. Reviewer links:

<https://www.ebi.ac.uk/metabolights/reviewer5eb6b480436b019d9f1351a828ee7c3d>  
<https://www.ebi.ac.uk/metabolights/reviewerd923ea1c3a53d000b97ccf383991032d>  
<https://www.ebi.ac.uk/metabolights/reviewer9be9cf4-9a7d-4fff-98d5-c3d574c3b7f5>  
<https://www.ebi.ac.uk/metabolights/reviewer08ce2d89-3945-45be-8a9b-4ea872fc86bf>  
<https://www.ebi.ac.uk/metabolights/reviewer07a4ce73-1e8e-46aa-80c8-0c2f26411174>  
<https://www.ebi.ac.uk/metabolights/reviewer2878413e6f8a6a883b27bdee8c1bbba6>

**Reagents and experimental sample preparation.** The derivatization chemicals, trimethylsilyl-N-methyl trifluoroacetamide (MSTFA) and N,O-Bis(trimethylsilyl)trifluoroacetamide (BSTFA) were obtained from CS-Chromatographie Service and pyridine from Sigma-Aldrich at >99.98% purity. Methoxyamine hydrochloride (MeOX; Sigma-Aldrich) aliquots were further dried at 60 °C in a drying oven for 1 h to remove residual moisture. Artificial seawater (ASW) was prepared within the range of natural salinity (36‰) by dissolving (per L of water) 26.37 g sodium chloride, 6.8 g magnesium sulfate heptahydrate, 5.67 g magnesium chloride hexahydrate, 1.47 g calcium chloride, 0.6 g potassium chloride, and 0.09 g potassium bromide. Following autoclave sterilization, pH was adjusted to 7.7 using sodium hydroxide. 1 mL of the following supplements and solutions were added: 150 mM monopotassium phosphate, 500 mM ammonium chloride pH 7.5, trace element solution, selenite-tungstate solution, vitamin solution, thiamine solution, B12 solution and 0.21 g sodium bicarbonate (**23**). Ultra-pure water (MQ) was prepared by purifying deionized water with an Astacus membraPure system (Astacus membraPure, 18.3 m $\Omega$  × cm 25 °C).

1 Metabolite standards were obtained from commercial sources (**Table S4**) and combined into  
2 mixtures in which each compound had a final concentration of 0.4 mM. Metabolite mixtures were  
3 prepared to (a) test the effect of salt and water on metabolite detection, (b) develop SeaMet, our marine  
4 metabolomics workflow, (c) compare metabolite detection before and after solid phase extraction (SPE)  
5 based sample preparation, and (d) to quantify the detection limits of specific compound classes (**Table**  
6 **S6**). Finally, multiple mixtures were prepared to document the retention times of 107 standards dissolved  
7 in ASW using SeaMet (**Table S4**). Sample aliquots for the above mentioned experiments were prepared  
8 by drying down 200  $\mu$ L of the mixture in a speed vacuum concentrator (Eppendorf Concentrator Plus<sup>(R)</sup>,  
9 2.5 h, 45°C, V-AQ) for all experiments except SPE comparison and quantification of detection limits. For  
10 the SPE comparison experiment, 400  $\mu$ L of the mix were dried down. For the quantification of metabolite  
11 classes, a serial dilution of the mix was prepared to obtain concentrations between 0.5 nmol and 80 nmol  
12 of each compound. All dried mixture samples were stored at 4 °C.

13  
14 **SeaMet metabolite derivatization.** To prepare marine samples for gas chromatography-mass  
15 spectrometry (GC-MS) analysis, 0.5 to 1 mL of a saltwater sample or experimental mixture dissolved in  
16 ASW was dried in a speed vacuum concentrator for 8 hours (Eppendorf Concentrator Plus<sup>(R)</sup>, 45°C, V-  
17 AQ). To further remove residual water locked within the salt pellet, 250  $\mu$ L of toluene (99.8%, < 0.2 %  
18 water) was added to each sample and the mixture was ultrasonicated for 10 min at maximum intensity.  
19 The toluene was subsequently removed under a gentle flow of N<sub>2</sub> gas. Metabolite derivatization was  
20 performed by adding 80  $\mu$ L of MeOX dissolved in pyridine (20 mg  $\times$  mL<sup>-1</sup>) to the dried pellet. The  
21 mixture was ultrasonicated (EMag Emmi-12HC®) for 10 min at maximum intensity, briefly vortexed to  
22 dissolve the pellet into solution, and subsequently incubated for 90 min at 37 °C using a thermal rotating  
23 incubator under constant rotation at 1350 rpm. The pyridine was removed from the sample at room  
24 temperature under a gentle flow of N<sub>2</sub> gas (approximately 1 hour). Following the addition of 100  $\mu$ L of  
25 BSTFA, the mixture was ultrasonicated for 10 min at maximum intensity, vortexed, and incubated for 30  
26 min at 37 °C using a thermal rotating incubator under constant rotation at 1350 rpm. The derivatized

1 mixture was ultrasonicated for 10 min at maximum intensity. Remaining salt in each sample was pelleted  
2 through centrifugation at 21.1 g for 2 min at 4 °C. 100 µL was transferred to a GC-MS vial for analysis.  
3 The full proposed method is publicly available at [dx.doi.org/10.17504/protocols.io.nyxdfxn](https://doi.org/10.17504/protocols.io.nyxdfxn).

4  
5 **GC-MS data acquisition.** All derivatized samples were analyzed on an Agilent 7890B GC coupled to an  
6 Agilent 5977A single quadrupole mass selective detector. Using an Agilent 7693 autosampler, 1 µL was  
7 injected in splitless mode through a GC inlet liner (ultra inert, splitless, single taper, glass wool, Agilent)  
8 onto a DB-5MS column (30 m × 0.25 mm, film thickness 0.25 µm; including 10 m DuraGuard column,  
9 Agilent). The inlet liner was changed every 50 samples to avoid damage to the GC column and associated  
10 shifts in retention times. The injector temperature was set at 290 °C. Chromatography was achieved with  
11 an initial column oven temperature set at 60 °C followed by a ramp of 20 °C min<sup>-1</sup> until 325 °C, then held  
12 for 2 mins. Helium carrier gas was used at a constant flow rate of 1 mL min<sup>-1</sup>. Mass spectra were acquired  
13 in electron ionization mode at 70 eV across the mass range of 50–600 m/z and a scan rate of 2 scans s<sup>-1</sup>.  
14 The retention time for the method locked using standard mixture of fatty acid methyl esters (Sigma  
15 Aldrich).

16  
17 **Data processing and analysis.** Raw Agilent data files were converted to mzXML files using Msconvert  
18 (24) and imported into XCMS (v. 2.99.6)(25) within the R software environment (v. 3.4.2) for data  
19 processing and analysis. Total ion chromatograms (TIC) were obtained using the xcmsRaw function.  
20 TICs comparing sample preparation steps were expressed as a percentage of the MQ control. For  
21 environmental and cell culture GC-MS profiles, peaks were picked using the matchedFilter algorithm in  
22 XCMS with a full width at half maximum set to 8.4, signal to noise threshold at 1, m/z width of 0.25 (step  
23 parameter), and m/z difference between overlapping peaks at 1 (*SI Appendix Text 1*). Resulting peaks  
24 were grouped, retention times corrected and regrouped using the density (bandwidth parameter set to 2)  
25 and obiwarp methods. Following peak filling, the CAMERA (v.1.32.0)(26) package was used to place  
26 m/z peaks into pseudo-spectra by grouping similar peaks with the groupFWHM function. Masses below

1 150  $m/z$  were removed from the resulting peak table and all profiles were normalized to the ribitol internal  
2 standard. Peaks occurring in run blanks and those with higher relative standard deviation scores (%RSD >  
3 25) in quality control samples (cell culture experiment only) were removed from the dataset. To  
4 determine differences in metabolite abundances between sediment habitats, metabolite peak data were  
5 analyzed using a Bray-Curtis informed non-metric multidimensional scaling analysis followed by an  
6 analysis of variance using distance matrices (ADONIS) to test if there are significant differences in  
7 metabolite composition between sites. To identify individual peaks that differed significantly between  
8 sediment habitats and between cell culture sampling time points, resulting peaks tables were also log  
9 transformed and compared using a one-way analysis of variance. All p-values were adjusted using the  
10 Benjamini-Hochberg method to control for false positives (27). Significant variables exhibiting large  
11 fold-change differences between starting and ending conditions were further investigated. CAMERA  
12 grouped peaks from the environmental survey, and those important to shifts in the cell culture experiment  
13 were identified using AMDIS (28). Peaks with NIST hits below 800 were compared to online  
14 BinVestigate (29) and Golm (21) data repositories. If no hit was provided, these were considered  
15 unknowns.

16  
17 **The effect of salt and water on metabolite detection.** To test the effect of salt on metabolite  
18 derivatization, metabolite mix aliquots were resuspended in 1 mL of ASW ranging in salinity from 0 to  
19 34‰ and dried as described above. Methoxamine-trimethylsilylation (TMS) two step derivatization was  
20 performed by resuspending each sample in 80  $\mu\text{L}$  of MeOX in pyridine ( $20 \text{ mg mL}^{-1}$ ) and incubating for  
21 90 min at 37 °C using a thermal rotating incubator under constant rotation at 1350 rpm. MSTFA was  
22 subsequently added to the mixture, and the mixture incubated under the same conditions for 90 min (14).  
23 Derivatized samples were centrifuged to pellet salt and the supernatant was transferred to a GC-MS vial  
24 for analysis. To test the independent effect of water on metabolite derivatization reactions, MQ was added  
25 to dried mixture aliquots in steps of 1  $\mu\text{L}$  from 0 to 10  $\mu\text{L}$ . Replicate water gradient samples were

1 subsequently derivatized as before using MeOX and MSTFA or by replacing the MSTFA reagent with  
2 BSTFA.

3  
4 **Marine metabolomics method development.** To show how each method development step increased  
5 signal intensity and reduced variation in metabolite detection, replicate mixture aliquots ( $n = 5$ ) were  
6 resuspended in 0.5 mL of ASW. Mixture aliquots ( $n = 5$ ) were also resuspended in MQ as a no-salt  
7 control to highlight the effects of saltwater on metabolite derivatization. 40  $\mu$ L ribitol (0.2 mM) and 100  
8  $\mu$ L cholestane (1 mM) were added to each aliquot as internal standards. MQ and ASW samples were first  
9 derivatized following the (i) two-step methoxamine-trimethylsilylation (TMS) previously described.

10 Successive steps in the proposed protocol were then applied to ASW samples to demonstrate the  
11 combined effects on metabolite detection: (ii) exchange of MSTFA for BSTFA, (iii) removal of residual  
12 water from the salt pellet by increasing the speed vacuum drying time and by introducing a toluene drying  
13 step to help extract water from the salt pellet, (iv) ultrasonication of the samples after the steps involving  
14 addition of toluene, MeOX, BSTFA and following the last derivatization step, and (v) drying the MeOX  
15 in pyridine reagent between derivatization reactions. Resulting GC-MS profiles were used to show  
16 increases in total signals detected with successive changes in the proposed protocol. Additionally, a cloud  
17 plot (using processed peak integration data) was generated to compare compounds dissolved in seawater  
18 and to show which metabolite ions exhibited significant (B.H. adjusted  $p < 0.05$ ) and large fold changes  
19 ( $\log_2(\text{FC}) > 2$ ) between the standard and the SeaMet method.

20  
21 **Solid phase extraction.** Replicate metabolite mix aliquots ( $n = 6$ ) were resuspended in 2 mL of artificial  
22 seawater. 0.5 mL was reserved from each sample to compare GC-MS profiles before and after SPE  
23 sample concentration. Inorganic salts were eluted and metabolites extracted from the remaining 1.5 mL  
24 mixture following a SPE based technique using Bond Elut styrene-divinylbenzene (PPL) columns (13).  
25 The internal standards ribitol and cholestane were added to both, the reserved sample (before SPE) and  
26 the resulting SPE-concentrated sample (after SPE). All samples were prepared for GC-MS analysis

1 following the proposed marine metabolomics method. Resulting profiles were compared using a cloud  
2 plot to show which metabolite ions exhibited significant (B.H. adjusted  $p < 0.05$ ) and large fold changes  
3 ( $\log_2(\text{FC}) > 2$ ) between the pre- and post- SPE treatments.

4  
5 **Environmental sampling.** Replicate porewater profiles were collected from coralline ( $n = 4$ ) and  
6 mangrove ( $n = 6$ ) sediments from Carrie Bow Cay (N 16° 04' 59", W 88° 04' 55") and Twin Cayes,  
7 Belize (N 16° 50' 3", W 88° 6' 23") using a 1 m steel lance with a 2  $\mu\text{m}$  inner diameter covered by  
8 0.063 mm steel mesh. Samples (2 mL water) were collected every 5 cm from the sediment surface to 15  
9 cm depth. Samples were immediately frozen at -20 °C until further analysis. Directly before preparation  
10 for GC-MS, the internal standards ribitol and cholestane were added to 0.5 mL of each environmental  
11 sample. The mixture was subsequently prepared for GC-MS analysis using the SeaMet method described  
12 above.

13  
14 **Cell culture sampling.** Replicate cultures ( $n = 3$ ) of *Marinobacter adhaerens* HP15 DsRed were  
15 cultivated in Marine Broth media at 18 °C and 240 rpm as previously described (30). Media samples from  
16 the cell cultures and a no-bacteria control media were collected at 0, 4, 8, 12, and 22 h post culture  
17 inoculation. Cell counts were monitored at each time point by measuring the optical density at 600 nm  
18 ( $\text{OD}_{600}$ ). Sampling was carried out by collecting 2 mL of each culture and pelleting the cells through  
19 centrifugation for 10 min, at 21.1  $g$  and 4 °C. The supernatant was immediately stored at -20 °C until  
20 preparation for GC-MS analysis. Prior to sample derivatization using SeaMet, ribitol (0.2 mM; 40  $\mu\text{L}$ )  
21 and cholestane (100 mM; 100  $\mu\text{L}$ ) were added to 0.5 mL of each experimental sample and subsequently  
22 dried down in a speed vacuum concentrator (8 hr, 45 °C, VA-Q). To control for technical variation,  
23 quality control (QC) samples ( $n = 3$ ) were prepared by combining 0.25  $\mu\text{L}$  of each culture supernatant and  
24 an extraction blank generated by drying down 0.5 mL of MQ.

25



## 1 **Supporting information**

2 Supporting information includes supporting tables, figures and references

3

4

## 5 **Acknowledgements**

6 We thank T. Gulstad, K. Caspersen, F. Fojt, and M. Meyer (MPI-Bremen) for support with data  
7 acquisition and sample preparation, N. Böttcher (Jacobs University Bremen) for providing culture  
8 samples, D. Michellod for sediment pore water sample collection, and B. Geier and J. Beckmann (MPI-  
9 Bremen) for valuable discussions. We acknowledge the Max-Planck Society and the Gordon and Betty  
10 Moore Foundation (Marine Microbial Initiative Investigator Award to ND, Grant #GBMF3811) for  
11 financial support. This work is contribution \*XXX\* from the Carrie Bow Cay Laboratory, Caribbean  
12 Coral Reef Ecosystem Program, National Museum of Natural History, Washington DC.

## 13 **References**

- 14 1. A J, *et al.* (2005) Extraction and GC/MS analysis of the human blood plasma metabolome. *Anal*  
15 *Chem* 77(24):8086-8094.
- 16 2. Fiehn O, *et al.* (2000) Metabolite profiling for plant functional genomics. *Nat Biotechnol*  
17 18:1157-1161.
- 18 3. Theriot CM, *et al.* (2014) Antibiotic-induced shifts in the mouse gut microbiome and metabolome  
19 increase susceptibility to *Clostridium difficile* infection. *Nat Commun* 5:3114.
- 20 4. Bruce TJ, *et al.* (2008) cis-Jasmone induces *Arabidopsis* genes that affect the chemical ecology of  
21 multitrophic interactions with aphids and their parasitoids. *Proc Natl Acad Sci U S A*  
22 105(12):4553-4558.
- 23 5. Fischer E & Sauer U (2003) Metabolic flux profiling of *Escherichia coli* mutants in central  
24 carbon metabolism using GC-MS. *Euro J Biochem* 270(5):880-891.
- 25 6. Villas-Boas SG, Noel S, Lane GA, Attwood G, & Cookson A (2006) Extracellular metabolomics:  
26 a metabolic footprinting approach to assess fiber degradation in complex media. *Anal Biochem*  
27 349(2):297-305.
- 28 7. Swenson TL, Jenkins S, Bowen BP, & Northen TR (2015) Untargeted soil metabolomics  
29 methods for analysis of extractable organic matter. *Soil Biol and Biochem* 80:189-198.
- 30 8. Moran MA, *et al.* (2016) Deciphering ocean carbon in a changing world. *Proc Natl Acad Sci U S*  
31 *A* 113(12):3143-3151.
- 32 9. Sunagawa S, *et al.* (2015) Structure and function of the global ocean microbiome. *Science*  
33 384(6237).

- 1 10. Koch BP, Ludwichowski K-U, Kattner G, Dittmar T, & Witt M (2008) Advanced  
2 characterization of marine dissolved organic matter by combining reversed-phase liquid  
3 chromatography and FT-ICR-MS. *Mar Chem* 111(3-4):233-241.
- 4 11. Petras D, *et al.* (2017) High-Resolution Liquid Chromatography Tandem Mass Spectrometry  
5 enables large scale molecular characterization of dissolved organic matter. *Front Mar Sci* 4.  
6 DOI:[10.3389/fmars.2017.00405](https://doi.org/10.3389/fmars.2017.00405)
- 7 12. Lechtenfeld OJ, Hertkorn N, Shen Y, Witt M, & Benner R (2015) Marine sequestration of carbon  
8 in bacteria metabolites. *Nat Comm* 6(6711).
- 9 13. Dittmar T, Koch B, Hertkorn N, & Kattner G (2008) A simple and efficient method for the solid-  
10 phase extraction of dissolved organic matter (SPE-DOM) from seawater. *Limnol Oceanogr*  
11 6:230-235.
- 12 14. Roessner U, Wagner C, Kopka J, Trethewey RN, & Willmitzer L (2000) Simultaneous analysis  
13 of metabolites in potato tuber by gas chromatography-mass spectrometry. *Plant J* 23(1):131-142.
- 14 15. Chan EC, Pasikanti KK, & Nicholson JK (2011) Global urinary metabolic profiling procedures  
15 using gas chromatography-mass spectrometry. *Nat Protoc* 6(10):1483-1499.
- 16 16. Kind T, *et al.* (2009) FiehnLib: mass spectral and retention index libraries for metabolomics  
17 based on quadrupole and time-of-flight gas chromatography/mass spectrometry. *Anal Chem*  
18 81:10038-10048.
- 19 17. Liebeke M & Ppuskas E (2019) Drying enhances signal intensity for global GC-MS  
20 metabolomics. [BioRxiv:doi.org/10.1101/544916](https://doi.org/10.1101/544916). Preprint, posted February 8, 2019.
- 21 18. Johnson WM, Kido Soule MC, & Kujawinski EB (2017) Extraction efficiency and quantification  
22 of dissolved metabolites in targeted marine metabolomics. *Limnol Oceanogr* 15(4):417-428.
- 23 19. Behrends V, Ebbels TM, Williams HD, & Bundy JG (2009) Time-resolved metabolic  
24 footprinting for nonlinear modeling of bacterial substrate utilization. *Appl Environ Microbiol*  
25 75(8):2453-2463.
- 26 20. Luzzatto-Knaan T, *et al.* (2017) Digitizing mass spectrometry data to explore the chemical  
27 diversity and distribution of marine cyanobacteria and algae. *Elife* 6. DOI:[10.7554/eLife.24214](https://doi.org/10.7554/eLife.24214)
- 28 21. Kopka J, *et al.* (2005) GMD@CSB.DB: the Golm metabolome database. *Bioinformatics*  
29 21(8):1635-1638.
- 30 22. Lai Z, *et al.* (2018) identifying metabolites by integrating metabolome databases with mass  
31 spectrometry cheminformatics. *Nat Methods* 15(1):53-56.
